# Supplementary material for: Integrating a redox flow battery into a Z-scheme water splitting system for enhancing the solar energy conversion efficiency
Source: Royal Society of Chemistry journal article supplement (doi:10.1039/c8ee01299g), 2018-12-17
Supplement: c8ee01299g1.pdf [file c8ee01299g1.pdf]

## Electronic Supplementary Information

### Integrating redox flow battery into Z-Scheme water splitting system for enhancing solar energy conversion efficiency

Zhen Li,<sup>†ab</sup> Wangyin Wang,<sup>†a</sup> Shichao Liao,<sup>a</sup> Mingyao Liu,<sup>ac</sup> Yu Qi,<sup>a</sup>  
Chunmei Ding<sup>a</sup> and Can Li<sup>\*a</sup>

<sup>a</sup> State Key Laboratory of Catalysis, Dalian Institute of Chemical Physics, Chinese Academy of Sciences; Dalian National Laboratory for Clean Energy, Collaborative Innovation Center of Chemistry for Energy Materials (iChEM), Dalian, 116023, China.  
E-mail: [canli@dicp.ac.cn](mailto:canli@dicp.ac.cn)

<sup>b</sup> University of Chinese Academy of Sciences, Beijing 100049, China

<sup>c</sup> Key Laboratory on Fuel Cell Technology of Guangdong Province, School of Chemistry and Chemical Engineering, South China University of Technology, Guangzhou, 510641, China

<sup>†</sup> These authors contribute equally to this work.

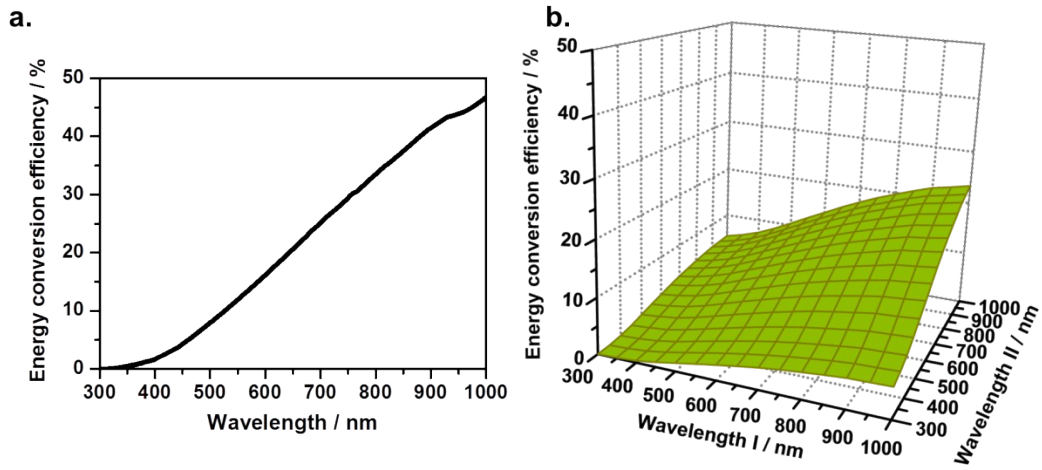

**Fig. S1** Theoretical maximal solar energy conversion efficiency as a function of band edge absorption wavelength in one-step water splitting system **a)** and as a function of band edge absorption wavelengths of two semiconductors in Z-scheme water splitting system **b)**. Solar irradiance used for the calculation is taken from AM 1.5G data.

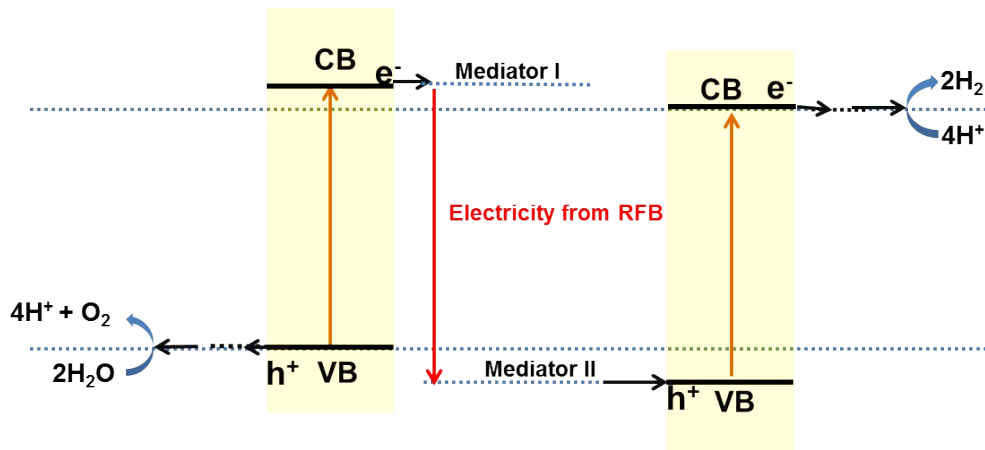

**Fig. S2** Schematic of the RFB-integrated Z-scheme water splitting system in an ideal case with the energy efficiency reaching 100%.

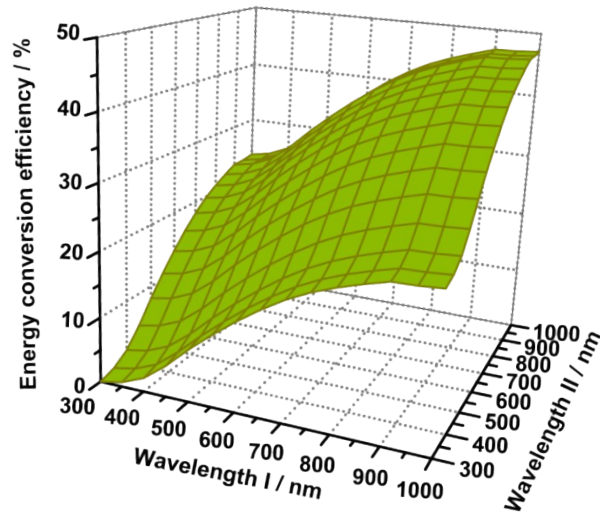

**Fig. S3** Theoretical maximal solar energy conversion efficiency as a function of the band edge absorption wavelengths of two semiconductors in the RFB-integrated Z-scheme water splitting system. Solar irradiance used for the calculation is taken from AM 1.5G data.

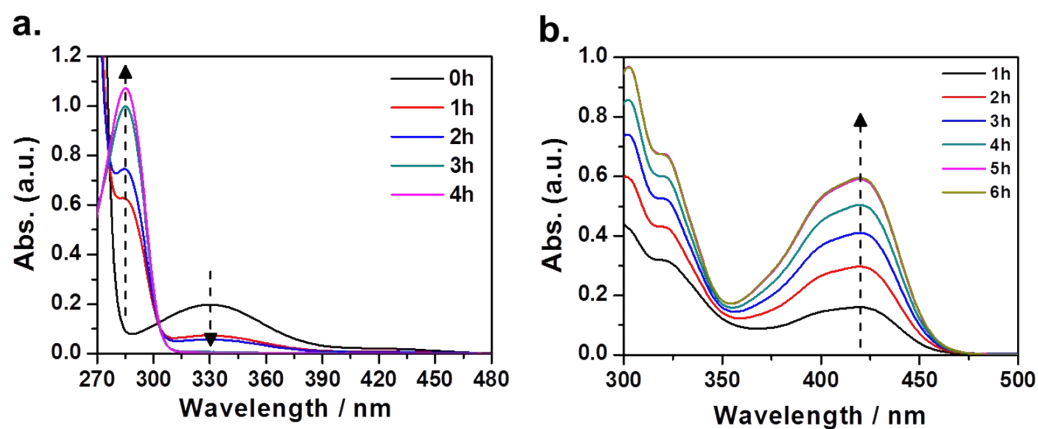

**Fig. S4 a)** UV-Vis absorption of the 10-times-diluted DMBQ/DMBQH<sub>2</sub> solution during the OER-charge process; the increasing absorption centered at 285 nm and the decreasing absorption at 330 nm indicate the conversion from DMBQ to DMBQH<sub>2</sub>. **b)** UV-Vis absorption of the 20-times-diluted Fe(CN)<sub>6</sub><sup>4-</sup>/Fe(CN)<sub>6</sub><sup>3-</sup> solution during the HER-charge process; the increasing absorption centered at 420 nm indicates the conversion from Fe(CN)<sub>6</sub><sup>4-</sup> to Fe(CN)<sub>6</sub><sup>3-</sup>.

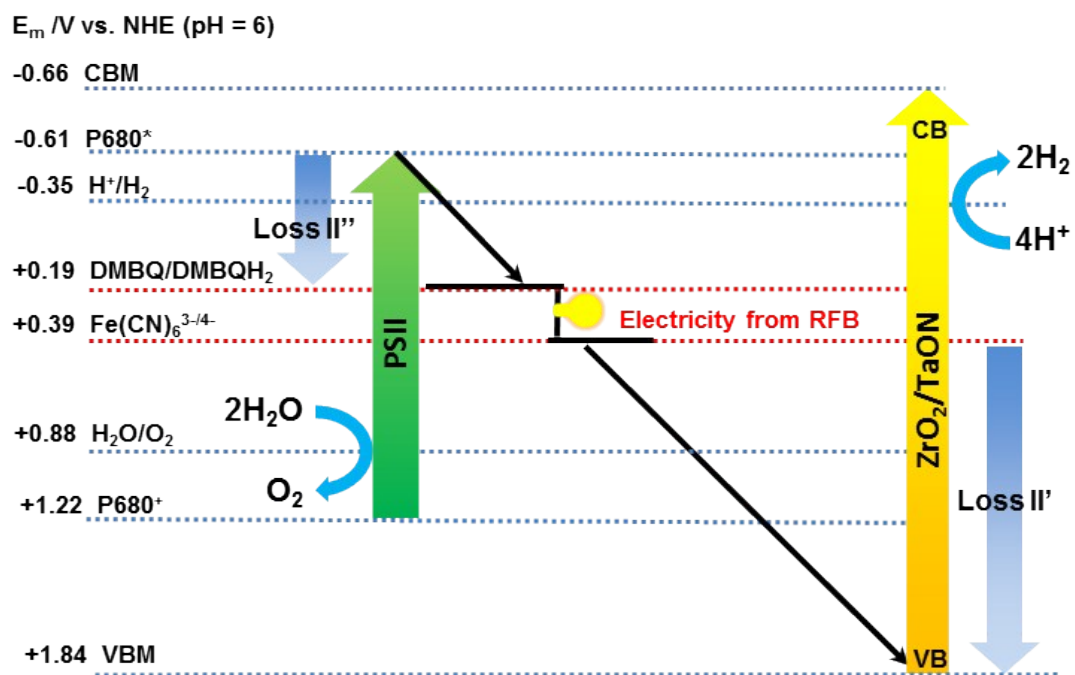

**Fig. S5** Schematic of the energy loss and electricity production in the quinone/ferricyanide RFB integrated PSII-ZrO<sub>2</sub>/TaON Z-scheme water splitting system.

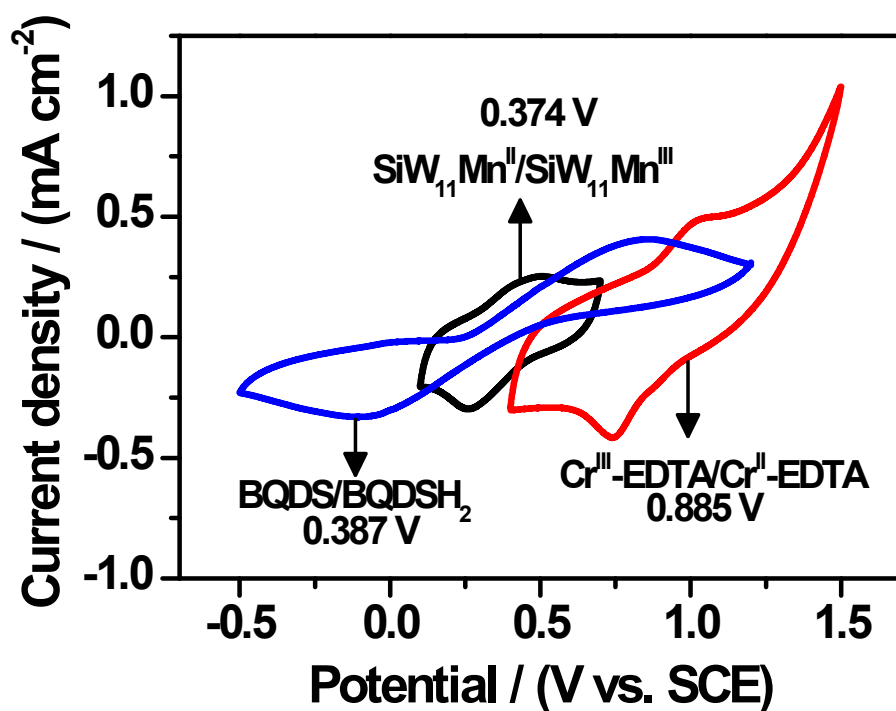

**Fig. S6** Cyclic voltammogram curves of 1 mM BQDSH<sub>2</sub>, [SiW<sub>11</sub>O<sub>39</sub>Mn<sup>II</sup>(H<sub>2</sub>O)]<sup>6-</sup>, Cr<sup>II</sup>-EDTA in 100 mM PBS solution scanned at 50 mV s<sup>-1</sup>. Cyclic voltammetry tests were performed in a three-electrode system with a graphite plate as the working electrode, a Pt plate as the counter electrode and a saturated calomel electrode as the reference electrode.

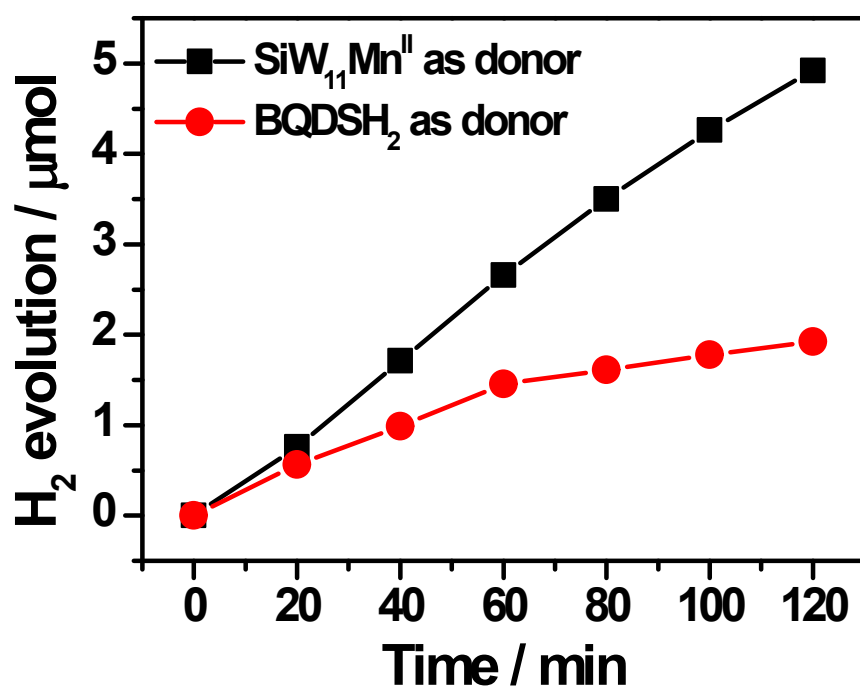

**Fig. S7** Time courses of hydrogen evolution by PtCrO<sub>x</sub>-ZrO<sub>2</sub>/TaON with 2.5 mM [SiW<sub>11</sub>O<sub>39</sub>Mn<sup>II</sup>(H<sub>2</sub>O)]<sup>6-</sup> and 10 mM BQDSH<sub>2</sub> as electron donors in 20 mL PBS buffer solution. Xenon lamp equipped with a 420 nm long-pass filter was used as light source. Temperature was 25 °C.
